# Supplementary material for: A Novel GATA2 Protein Reporter Mouse Reveals Hematopoietic Progenitor Cell Types
Source: PubMed Central journal article supplement — Stem Cell Reports. 2020 Jul 9;15(2):326–39. doi: 10.1016/j.stemcr.2020.06.008 (PMC7419669; doi:10.1016/j.stemcr.2020.06.008), 2020-07-09
Supplement: mmc1.pdf [file mmc1.pdf]

**Stem Cell Reports, Volume 15**

**Supplemental Information**

**A Novel GATA2 Protein Reporter Mouse Reveals Hematopoietic Progenitor Cell Types**

**Nouraz Ahmed, Leo Kunz, Philipp S. Hoppe, Dirk Loeffler, Martin Etzrodt, Germán Camargo Ortega, Oliver Hilsenbeck, Konstantinos Anastassiadis, and Timm Schroeder**

## Supplemental information:

## Supplemental Figures:

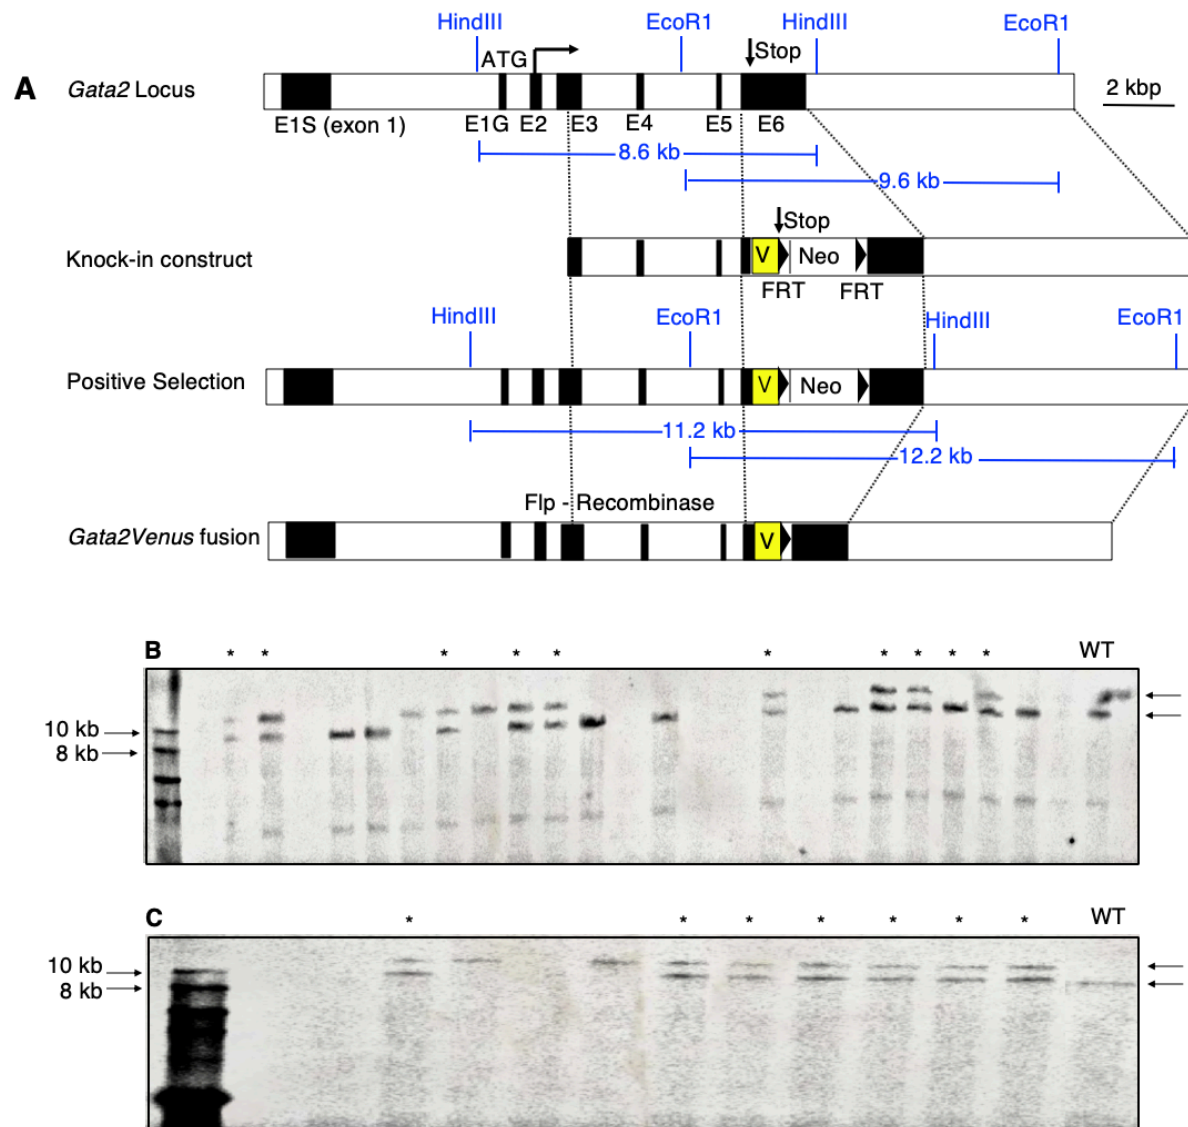

**Figure S1. Correct integration of *Gata2Venus* cassette (see main figure 1).** (A) Schematic illustration of generation of *Gata2* allele with *Venus* fusion before STOP codon in Exon VI. Restriction sites and expected band size for 5' and 3' southern blot probes are shown in blue. (B) 5' end southern blot image to show correct integration of *Gata2Venus* cassette in mouse genome. The genomic DNA was digested with HindIII and hybridized with a 5' probe. Correct 5' end integration was confirmed in 10 ESC clones (indicated with stars). Top band (11261 bp) indicates knock-in allele and bottom band (8643 bp) indicates wild-type allele. (C) 3' end southern blot image to highlight correct integration of *Gata2Venus* cassette in mouse genome. The genomic DNA was digested with EcoRI and hybridized with a 3' probe (grey bar). 7 out of 10 clones exhibited correct 3' integration (indicated with stars). Top band (12286 bp) indicates knock-in allele and bottom band (9671 bp) indicates wild-type allele. Arrows in B and C indicate position of DNA marker (left) and genomic DNA bands (right). (see main figure 1)

| Type of cross | Pups born | Expected genotype frequency |     |      | Observed genotype frequency |      |      |
|---------------|-----------|-----------------------------|-----|------|-----------------------------|------|------|
|               |           | homo                        | het | wt   | homo                        | het  | wt   |
| homo X wt     | 24        | 0                           | 1   | 0    | 0                           | 1    | 0    |
| het X wt      | 29        | 0                           | 0.5 | 0.5  | 0                           | 0.45 | 0.55 |
| het X het     | 22        | 0.25                        | 0.5 | 0.25 | 0.27                        | 0.5  | 0.23 |
| homo X het    | 26        | 0.5                         | 0.5 | 0    | 0.5                         | 0.5  | 0    |
| homo X homo   | 41        | 1                           | 0   | 0    | 1                           | 0    | 0    |

**Figure S2. Mendelian frequency is not altered in GATA2VENUS mouse line (see main figure 1).** Mice with different genotype backgrounds of GATA2VENUS allele were crossed and resulting frequency of offspring genotypes was quantified and compared to expected frequency for > 6 litters born. Different types of crosses include (1) GATA2VENUS homozygous (homo) crossed with wild-type (wt), (2) GATA2VENUS heterozygous (het) crossed with wild-type (wt), (3) GATA2VENUS heterozygous (het) crossed with GATA2VENUS heterozygous (het), (4) GATA2VENUS homozygous (homo) crossed with GATA2VENUS heterozygous (het) and (5) GATA2VENUS homozygous (homo) and (5) GATA2VENUS homozygous (homo) mice. (see main figure 1)

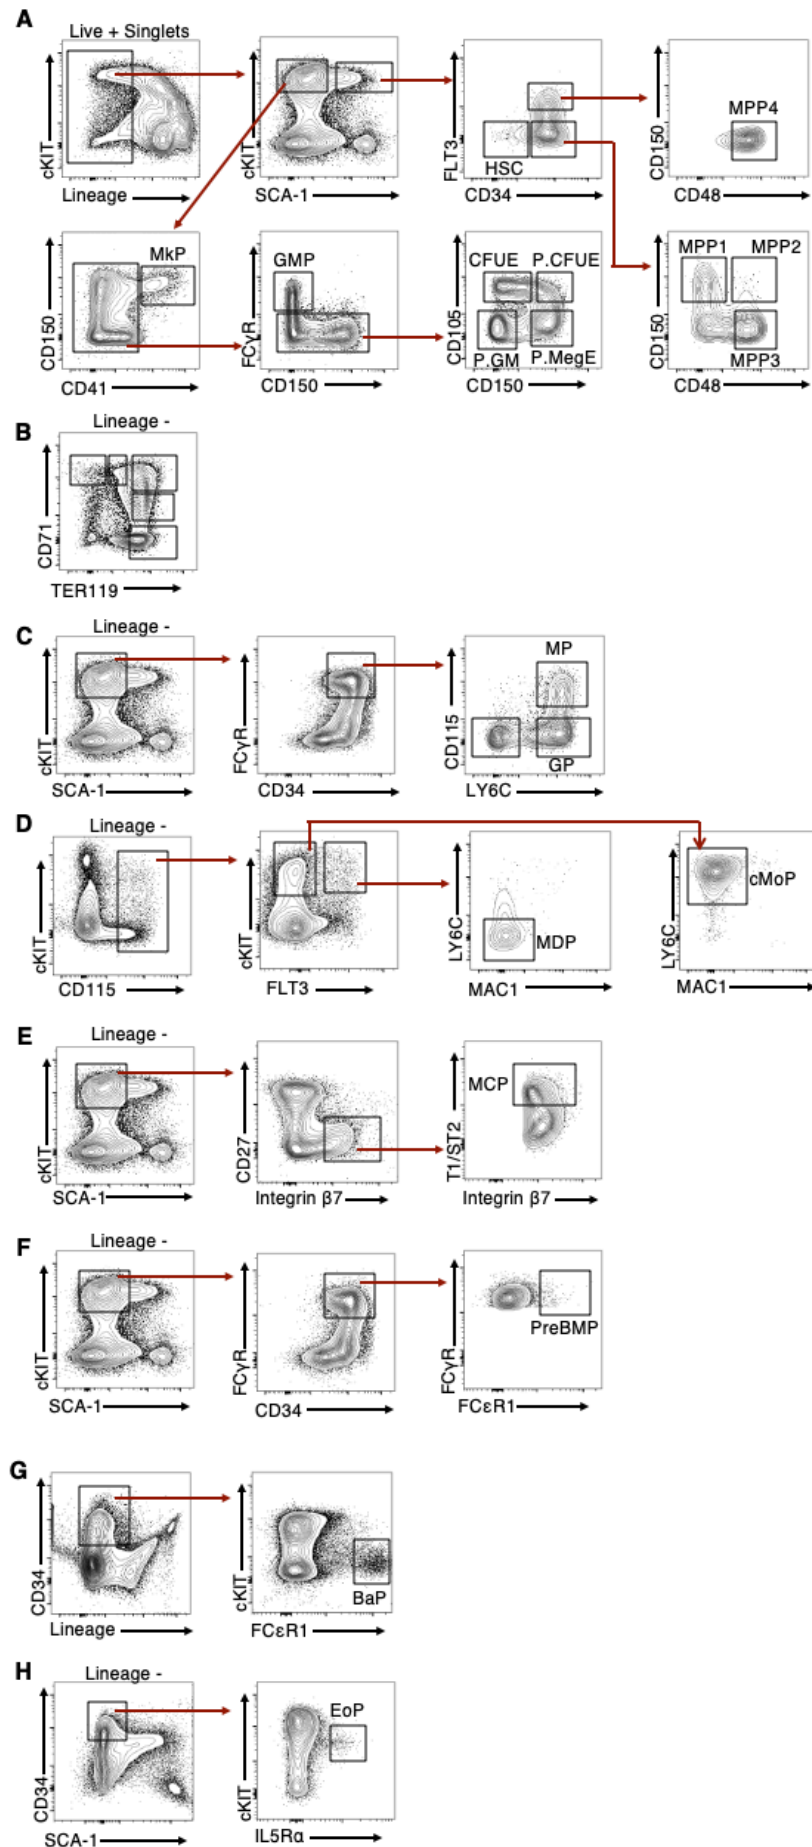

**Figure S3. FACS gating scheme used for analysis and isolation of hematopoietic stem and progenitor cells (see main figure 3).**

(A) HSC – Hematopoietic Stem Cell, MPP 1-4 – Multipotent Progenitor 1-4, P.MegE – pre Megakaryocyte Erythrocyte, MkP – Megakaryocyte progenitor, P.CFUE – pre colony forming unit Erythrocyte, CFUE – colony forming unit Erythrocyte, preGM – pre Granulocyte Monocyte Progenitor. (B) Erythrocyte differentiation stages based on CD71 and TER119 expression. (C) MP – Monocyte progenitor, GP – Granulocyte progenitor. (D) MDP – Monocyte Dendritic cell progenitor, cMoP – common Monocyte progenitor. (E) MCP – Mast cell progenitor. (F) preBMP – pre Basophil Mast cell progenitor. (G) BaP – Basophil progenitor. (H) EoP – Eosinophil progenitor. (see main figure 3)

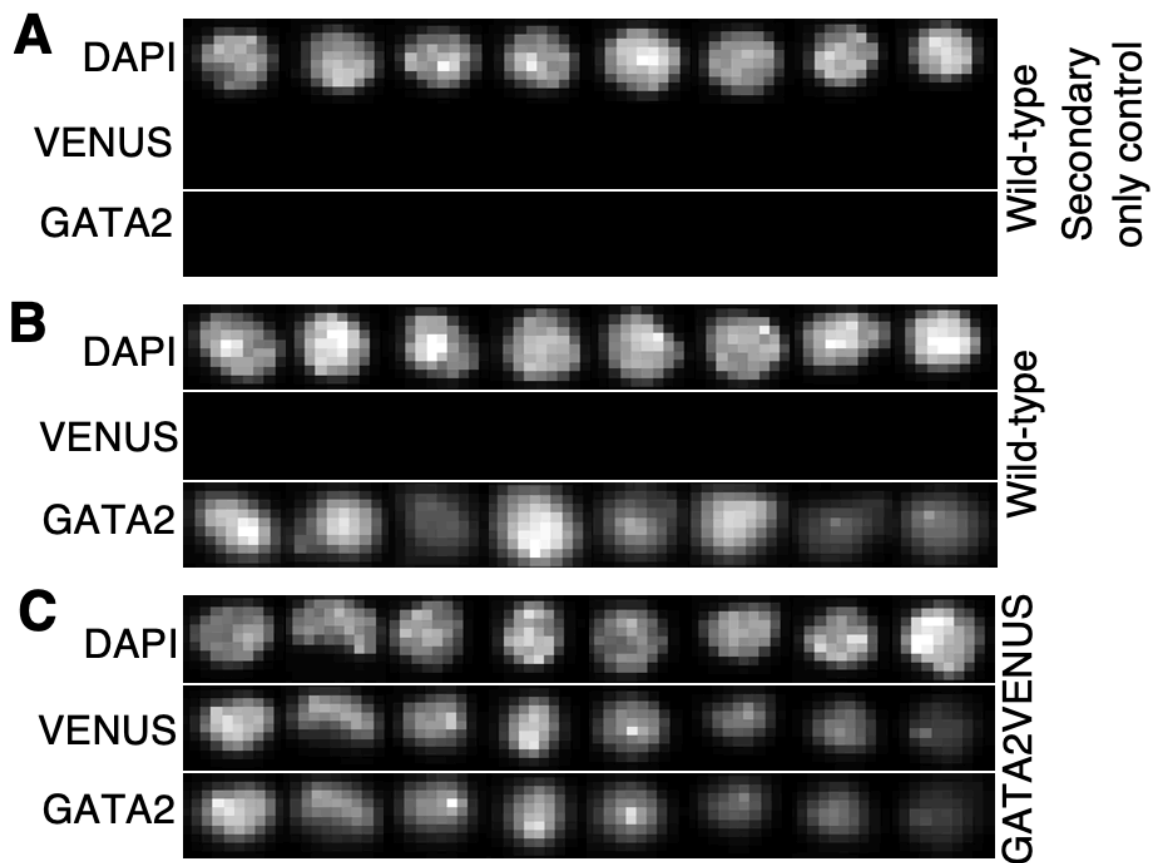

**Supplementary Figure S4. Colocalization of GATA2 and VENUS signal inside GATA2VENUS nuclei (see main figure 1).** Localization of GATA2 and VENUS in P.MegE from wild-type mouse (VENUS negative control) without (**A**) and with (**B**) primary anti-GATA2 antibody. (**C**) With primary anti-GATA2 antibody in GATA2VENUS P.MegE. See Figure 1K. Image tile: 10  $\mu$ m.

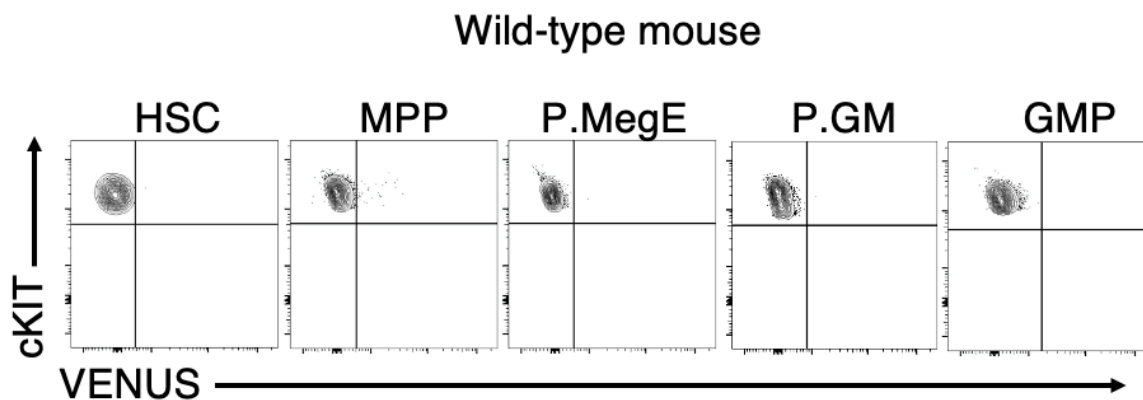

**Figure S5. VENUS fluorescence channel background in wild-type HSPCs (see main figure 3).** FACS of VENUS channel in HSPCs from a 12-week old wild-type mouse. Used to set background levels of GATA2VENUS expression in cells from GATA2VENUS mouse line in Figure 3.

**Abbreviations:** HSC – Hematopoietic Stem Cell, MPP – Multipotent Progenitor, P.MegE – pre Megakaryocyte Erythrocyte, preGM – pre Granulocyte Monocyte, GMP – Granulocyte Monocyte Progenitor. (see main figure 3)

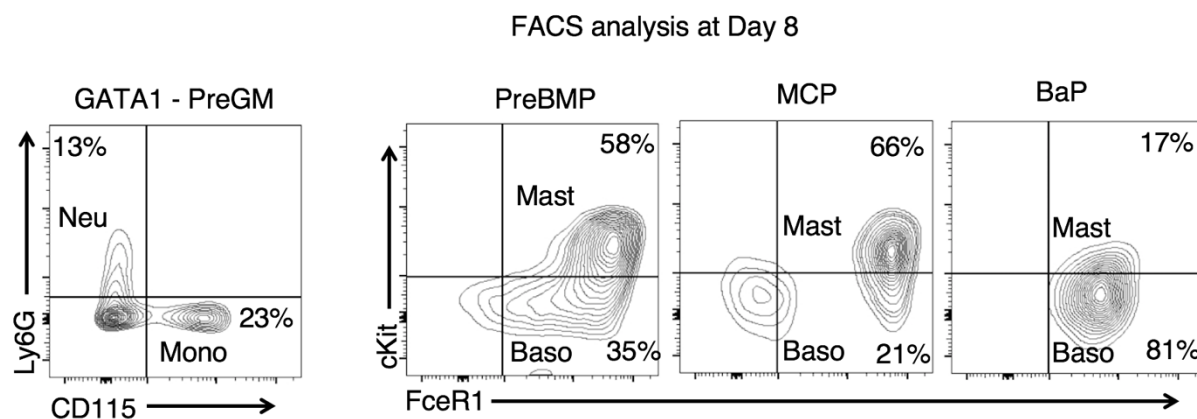

**Figure S6. Pan myeloid media conditions support survival, proliferation and differentiation of different granulocyte and monocyte lineages (see main figure 5 & 6).** GATA1-low preGMs, preBMPs, MCPs and BaPs from PU.1eYFP/GATA1mCHERRY mice (Hoppe et al., 2016) were sorted and cultured for 8 days in pan myeloid media supporting survival, proliferation and differentiation of monocytes, neutrophils, basophils and mast cells. Mature cell types were detected at day 8 by flow cytometry analysis of lineage specific markers including cKIT<sup>+</sup> FcεR1<sup>+</sup> cells (mast cells), cKIT<sup>-</sup> FcεR1<sup>+</sup> cells (basophils), LY6G<sup>+</sup> cells (neutrophils) and CD115<sup>+</sup> cells (monocytes). Positive gates were set using unstained control cells.

**Abbreviations:** preGM – pre Granulocyte Monocyte, preBMP – pre Basophil Mast cell progenitor, MCP – Mast cell progenitor and BaP – Basophil progenitor. (see main figure 5 & 6)

**Table S1:** FACS gating scheme used for analysis and isolation of hematopoietic stem and progenitor cells. (Related to main figure 3)

| Cell type | Surface marker combination |                      |                        |                               |                                 |                               | Ref                                                                       |
|-----------|----------------------------|----------------------|------------------------|-------------------------------|---------------------------------|-------------------------------|---------------------------------------------------------------------------|
| Lineage*  | CD3e                       | B220                 | CD19                   | CD11b                         | Gr-1                            | TER119                        | (Cabezas-Wallscheid et al., 2014; Kiel et al., 2005; Wilson et al., 2008) |
| HSC       | Lin <sup>-</sup>           | SCA-1 <sup>+</sup>   | cKIT <sup>+</sup>      | CD135 <sup>-</sup>            | CD34 <sup>-</sup>               | CD48 <sup>-</sup>             | (Cabezas-Wallscheid et al., 2014; Kiel et al., 2005; Wilson et al., 2008) |
| MPP1      | Lin <sup>-</sup>           | SCA-1 <sup>+</sup>   | cKIT <sup>+</sup>      | CD135 <sup>-</sup>            | CD34 <sup>+</sup>               | CD48 <sup>-</sup>             | (Cabezas-Wallscheid et al., 2014; Kiel et al., 2005; Wilson et al., 2008) |
| MPP2      | Lin <sup>-</sup>           | SCA-1 <sup>+</sup>   | cKIT <sup>+</sup>      | CD135 <sup>-</sup>            | CD34 <sup>+</sup>               | CD48 <sup>+</sup>             | (Cabezas-Wallscheid et al., 2014; Kiel et al., 2005; Wilson et al., 2008) |
| MPP3      | Lin <sup>-</sup>           | SCA-1 <sup>+</sup>   | cKIT <sup>+</sup>      | CD135 <sup>-</sup>            | CD34 <sup>+</sup>               | CD48 <sup>+</sup>             | (Cabezas-Wallscheid et al., 2014; Kiel et al., 2005; Wilson et al., 2008) |
| MPP4      | Lin <sup>-</sup>           | SCA-1 <sup>+</sup>   | cKIT <sup>+</sup>      | CD135 <sup>+</sup>            | CD34 <sup>+</sup>               | CD48 <sup>+</sup>             | (Cabezas-Wallscheid et al., 2014; Kiel et al., 2005; Wilson et al., 2008) |
| P. MegE   | Lin <sup>-</sup>           | SCA-1 <sup>-</sup>   | cKIT <sup>+</sup>      | CD16/32 <sup>-</sup>          | CD41 <sup>-</sup>               | CD105 <sup>-</sup>            | (Pronk et al., 2007)                                                      |
| MkP       | Lin <sup>-</sup>           | SCA1 <sup>-</sup>    | cKIT <sup>+</sup>      | CD16/32 <sup>-</sup>          | CD41 <sup>+</sup>               | CD105 <sup>-</sup>            | (Pronk et al., 2007)                                                      |
| P. CFUE   | Lin <sup>-</sup>           | SCA-1 <sup>-</sup>   | cKIT <sup>+</sup>      | CD16/32 <sup>-</sup>          | CD41 <sup>-</sup>               | CD105 <sup>+</sup>            | (Pronk et al., 2007)                                                      |
| CFUE      | Lin <sup>-</sup>           | SCA-1 <sup>-</sup>   | cKIT <sup>+</sup>      | CD16/32 <sup>-</sup>          | CD41 <sup>-</sup>               | CD105 <sup>+</sup>            | (Pronk et al., 2007)                                                      |
| Ery-S1    | Lin <sup>-</sup>           | CD71 <sup>high</sup> | TER119 <sup>low</sup>  |                               |                                 |                               | (Pop et al., 2010)                                                        |
| Ery-S2    | Lin <sup>-</sup>           | CD71 <sup>high</sup> | TER119 <sup>mid</sup>  |                               |                                 |                               | (Pop et al., 2010)                                                        |
| Ery-S3    | Lin <sup>-</sup>           | CD71 <sup>high</sup> | TER119 <sup>high</sup> |                               |                                 |                               | (Pop et al., 2010)                                                        |
| Ery-S4    | Lin <sup>-</sup>           | CD71 <sup>mid</sup>  | TER119 <sup>high</sup> |                               |                                 |                               | (Pop et al., 2010)                                                        |
| Ery-S5    | Lin <sup>-</sup>           | CD71 <sup>low</sup>  | TER119 <sup>high</sup> |                               |                                 |                               | (Pop et al., 2010)                                                        |
| preGM     | Lin <sup>-</sup>           | SCA-1 <sup>-</sup>   | cKIT <sup>+</sup>      | CD16/32 <sup>-</sup>          | CD41 <sup>-</sup>               | CD105 <sup>-</sup>            | (Pronk et al., 2007)                                                      |
| GMP       | Lin <sup>-</sup>           | SCA-1 <sup>-</sup>   | cKIT <sup>+</sup>      | CD16/32 <sup>+</sup>          | CD41 <sup>-</sup>               | CD105 <sup>-</sup>            | (Pronk et al., 2007)                                                      |
| MP        | Lin <sup>-</sup>           | SCA-1 <sup>-</sup>   | cKIT <sup>+</sup>      | CD16/32 <sup>+</sup>          | CD34 <sup>+</sup>               | Ly6C <sup>+</sup>             | (Yanez et al., 2017)                                                      |
| GP        | Lin <sup>-</sup>           | SCA-1 <sup>-</sup>   | cKIT <sup>+</sup>      | CD16/32 <sup>+</sup>          | CD34 <sup>+</sup>               | Ly6C <sup>+</sup>             | (Yanez et al., 2017)                                                      |
| cMoP      | Lin <sup>-</sup>           | cKIT <sup>+</sup>    | CD115 <sup>+</sup>     | CD135 <sup>-</sup>            | LY6C <sup>+</sup>               | CD11b <sup>-</sup>            | (Hettinger et al., 2013)                                                  |
| MDP       | Lin <sup>-</sup>           | cKIT <sup>+</sup>    | CD115 <sup>+</sup>     | CD135 <sup>+</sup>            | LY6C <sup>-</sup>               | CD11b <sup>-</sup>            | (Hettinger et al., 2013)                                                  |
| EoP       | Lin <sup>-</sup>           | SCA-1 <sup>-</sup>   | cKIT <sup>mid</sup>    | CD34 <sup>+</sup>             | IL5R $\alpha$ <sup>+</sup>      |                               | (Iwasaki et al., 2005)                                                    |
| preBMP    | Lin <sup>-</sup>           | SCA-1 <sup>-</sup>   | cKIT <sup>+</sup>      | CD16/32 <sup>+</sup>          | CD34 <sup>+</sup>               | FC $\epsilon$ R1 <sup>+</sup> | (Qi et al., 2013)                                                         |
| BaP       | Lin <sup>-</sup>           | cKIT <sup>-</sup>    | CD34 <sup>+</sup>      | FC $\epsilon$ R1 <sup>+</sup> |                                 |                               | (Arinobu et al., 2005)                                                    |
| MCP       | Lin <sup>-</sup>           | SCA-1 <sup>-</sup>   | cKIT <sup>+</sup>      | CD27 <sup>-</sup>             | Integrin $\beta$ 7 <sup>+</sup> |                               | (Chen et al., 2005)                                                       |
|           |                            | T1/ST2 <sup>+</sup>  |                        |                               |                                 |                               |                                                                           |

\*TER119 lineage antibody was omitted during analysis of Erythroid stages S1 – S5.

\*CD11b lineage antibody was omitted during analysis of Eosinophil progenitors (EoPs) and Basophil progenitors (BaPs).



**Table S2:** List of antibodies for FACS analysis and isolation of HSPCs. (Related to experimental procedures)

| <b>Antigen</b>            | <b>Conjugation</b>          | <b>Clone</b>     | <b>Company</b>               | <b>Catalog no</b>        |
|---------------------------|-----------------------------|------------------|------------------------------|--------------------------|
| Streptavidin<br>(Lineage) | BV711                       | N/A              | BD Biosciences               | 563262                   |
| SCA-1                     | Pacific blue<br>PerCP-CY5.5 | D7<br>D7         | Biolegend<br>eBiosciences    | 108120<br>45-5981-82     |
| cKIT                      | PE-CY7<br>BV510             | 2B8<br>ACK2      | eBiosciences<br>Biolegend    | 25-1171-82<br>135119     |
| CD135                     | PerCPeFL710<br>PECF594      | A2F10<br>A2F10.1 | eBioscience<br>BD Bioscience | 46-1351-82<br>562537     |
| CD34                      | eFL660<br>eFL450            | RAM34<br>RAM34   | eBioscience<br>eBioscience   | 50-0341-82<br>48-0341-82 |
| CD48                      | APCeFL780                   | HM48-1           | eBioscience                  | 47-0481-82               |
| CD150                     | PE                          | TC15-12F12.2     | Biolegend                    | 115904                   |
| CD16/32                   | PE-CY7<br>APC-CY7           | 93<br>93         | Biolegend<br>Biolegend       | 101317<br>101328         |
| CD41                      | BV605                       | MWReg30          | BD Biosciences               | 563317                   |
| CD105                     | APC                         | MJ7/18           | Biolegend                    | 120414                   |
| CD71                      | APC                         | R17.217.1.4      | eBioscience                  | 17-0711-82               |
| TER119                    | APCeFL780                   | Ter-119          | eBioscience                  | 47-5921-82               |
| T1/ST2                    | PE                          | DIH9             | Biolegend                    | 145304                   |
| IL5Ra                     | PE                          | DIH37            | Biolegend                    | 153404                   |
| CD115                     | PE                          | AFS98            | eBioscience                  | 12-1152-82               |
| Integrin B7               | PE-CY7                      | FIB504           | eBioscience                  | 25-5867-41               |
| FCeR1                     | APC                         | MAR-1            | eBioscience                  | 17-5898-82               |
| CD11b                     | APC                         | M1/70            | eBioscience                  | 17-0112-81               |
| CD27                      | APC-CY7                     | LG.3A10          | Biolegend                    | 124226                   |
| LY6C                      | APC-Fire 750                | HK1.4            | Biolegend                    | 128026                   |

**Table S3:** List of antibodies used in lineage depletion cocktail. (Related to experimental procedures)

| <b>Antigen</b> | <b>Conjugation</b> | <b>Clone</b> | <b>Company</b> | <b>Catalog no</b> |
|----------------|--------------------|--------------|----------------|-------------------|
| B220           | Biotin             | RA3-6B2      | eBioscience    | 13-0452-86        |
| CD19           | Biotin             | MB19-1       | eBioscience    | 13-0191-86        |
| CD3e           | Biotin             | 145-2C11     | eBiosciences   | 13-0031-85        |
| CD11b          | Biotin             | M1/70        | eBioscience    | 13-0112-85        |
| Gr-1           | Biotin             | RB6-8C5      | eBioscience    | 13-5931-85        |
| TER119         | Biotin             | Ter-119      | eBioscience    | 13-5921-85        |

**Table S4:** List of antibodies used for live imaging of myeloid colonies. (Related to main figure 6)

| <b>Surface marker</b> | <b>Conjugate</b> | <b>Clone</b> | <b>Company</b> | <b>Catalog no</b> |
|-----------------------|------------------|--------------|----------------|-------------------|
| CD115                 | PE               | AFS98        | eBioscience    | 12-1152-82        |
| LY6G                  | BV480            | 1A8          | BD Biosciences | 746448            |
| FC $\epsilon$ R1      | APC              | MAR-1        | eBioscience    | 17-5898-82        |

**Table S5:** List of antibodies for quantitative immunostaining of transcription factors. (Related to main figure 4)

| <b>Antigen</b>     | <b>Antibody</b>   | <b>Dilution</b> | <b>Clone</b> | <b>Company</b> | <b>Catalog no</b> |
|--------------------|-------------------|-----------------|--------------|----------------|-------------------|
| GATA2              | Rabbit anti-GATA2 | 1:50            | H-116        | SCBT           | sc-9008           |
| GATA1              | Rat anti-GATA1    | 1:25            | N6           | SCBT           | sc-265            |
| FOG-1              | Goat anti-FOG1    | 1:50            | M-20         | SCBT           | sc-9361           |
| PU.1               | Rabbit anti-PU.1  | 1:50            | T-21         | SCBT           | sc-352            |
| CEBPa              | Rabbit anti-CEBPa | 1:50            | 14AA         | SCBT           | sc-61             |
| IRF8               | Goat anti-IRF8    | 1:50            | C-19         | SCBT           | sc-6058           |
| VENUS              | chicken anti-GFP  | 1:1000          | Polyclonal   | Aves           | GFP-1020          |
| GATA2<br>(tissues) | rabbit anti-GATA2 | 1:200           | Polyclonal   | Novus          | NBP1-<br>82581    |

| <b>Secondary Antibody</b> | <b>Conjugation</b> | <b>Dilution</b> | <b>Company</b> | <b>Catalog no</b> |
|---------------------------|--------------------|-----------------|----------------|-------------------|
| Donkey anti-rabbit        | Alexa 488          | 1:200           | Invitrogen     | A21206            |
| Donkey anti-rat           | Alexa 594          | 1:200           | Invitrogen     | A21209            |
| Donkey anti-goat          | Alexa 594          | 1:200           | Invitrogen     | A11058            |

**Table S6:** List of cytokines for culture of HSPCs. (Related to main figure 5 & 6)

| <b>Cytokine</b> | <b>Concentration</b> | <b>Company</b> | <b>Catalog no</b> |
|-----------------|----------------------|----------------|-------------------|
| SCF             | 100 ng/ml            | Peprotech      | 250-03            |
| EPO             | 2 units/ml           | Peprotech      | 100-64            |
| TPO             | 100 ng/ml            | Peprotech      | 315-14            |
| IL3             | 20 ng/ml             | Peprotech      | 213-13            |
| IL6             | 10 ng/ml             | Peprotech      | 216-16            |
| IL9             | 50 ng/ml             | Peprotech      | 219-19            |
| GM-CSF          | 20 ng/ml             | Peprotech      | AF-315-03         |

**Table S7:** List of filters used for imaging and quantification of transcription factor immunostainings. (Related to main figure 4)

| <b>Fluorophore</b> | <b>Filter</b> | <b>Ex.spec</b> | <b>Em.spec</b> | <b>Beamsplitter</b> | <b>Company</b> | <b>Catalog no</b>             |
|--------------------|---------------|----------------|----------------|---------------------|----------------|-------------------------------|
| Alexa 488          | EGFP ET       | 470/40         | 525/50         | 495 LP              | AHF            | F46-002                       |
| Alexa 594          | mCherry       | 550/32         | 605/15         | BS 585              | AHF            | F37-550<br>F38-585<br>F37-605 |
| DAPI               | DAPI          | 405/10         | 460/50         | 405 LPX             | AHF            | F39-404<br>F47-460<br>F48-404 |

**Table S8:** List of filters used for imaging of liquid culture colonies. (Related to main figure 6)

| <b>Fluorophore</b>   | <b>Filter</b> | <b>Ex.spec</b> | <b>Em.spec</b> | <b>Beamsplitter</b> | <b>Company</b> | <b>Catalog no</b>             |
|----------------------|---------------|----------------|----------------|---------------------|----------------|-------------------------------|
| GATA2VENUS           | YFP ET        | 500/20         | 535/30         | 515 LP              | AHF            | F46-003                       |
| CD115-PE             | mCherry       | 550/32         | 605/15         | BS 585              | AHF            | F37-550<br>F38-585<br>F37-605 |
| FC $\epsilon$ R1-APC | Cy5           | 620/60         | 700/75         | LPXR 660            | AHF            | F49-620<br>F48-660<br>F47-700 |
| LY6G-BV480           | CFP ET        | 436/20         | 480/40         | 455 LP              | AHF            | F46-001                       |

## Experimental procedures:

### Generation of GATA2VENUS knock-in reporter mouse line:

The GATA2Venus knock-in construct consists of 5.0 *kb* 5'-end homology arm lasting until the last codon of *Gata2* (skipping the endogenous stop-codon) followed by a 24 *bp*-short linker sequence (AGAGCATCAGGTACCAGTGGAGCT) encoding 8-amino acid peptide (Arg-Ala-Ser-Gly-Thr-Ser-Gly-Ala), the coding sequence of *Venus*, FRT (Flp recognition target)-flanked neomycin resistance gene cassette and 5 *kb* 3'-end homology arm. Downstream of the 3'-homology arm there is a negative selection cassette consisting of herpes simplex virus thymidine kinase (HSV-TK) driven by the MC1 promoter. JM8.A3.N1 ES cells (C57BL/6J background) were electroporated (250 V, 500  $\mu$ F; Gene Pulser Xcell, BioRad) with linear (*Gata2Venus*) construct followed by selection with 0.2 mg/ml G418 and 2  $\mu$ M ganciclovir. 24 clones were picked, expanded and prepared for screening according to described protocols (Anastassiadis et al., 2013). Correct integration was confirmed in 9 clones by 5'- and 3'-end southern blot assay. In brief, genomic DNA was digested with HindIII (for 5' end) or EcoRI (for 3' end), separated on 0.8% agarose gels, blotted on nylon membranes (PALL) and hybridized with radioactively labeled ( $^{32}$ P-dCTP) by random priming (High Prime, Roche diagnostics) 5'- and 3'-probe respectively. Germline chimeras were generated from correct ES cell clone by ES-cell aggregation. Founders were identified by *Gata2Venus* PCR and FRT-flanked neo-selection cassette was excised *in vivo* using recombinase-mediated excision by crossing with Flpe deleter strain (Dymecki, 1996). Resulting GATA2VENUS offspring were backcrossed for >5 generations with C57BL/6J animals. Identification of homozygous *Gata2Venus* and wild-type animals was done by *Gata2Venus* specific genotyping protocol using the following set of primers: (a) *Gata2* forward primer: 5'- GAAGTCACCGCCCTTCAGTG -3', (b) *Gata2* reverse primer: 5'- CTGCCAAACCACCCTTGATG -3' and (c) *Venus* reverse primer: 5'- CGGACACGCTGAACCTGTGG -3'. *Gata2Venus* alleles is identified by a 290 bp band while wild-type *Gata2* allele by a 222 bp band.

### Isolation of primary HSPCs:

Male mice for FACS analysis and HSPC isolation were euthanized at age of 12 – 16 weeks. Isolation of primary HSPCs was performed according to protocols described<sup>27-37</sup>. Briefly, femurs, tibiae, humeri and vertebrae of adult mice were isolated, crushed in FACS buffer (2% FCS (PAA) + 1mM EDTA (Invitrogen) in PBS (Sigma Aldrich)), subjected to ACK (Lonza) lysis buffer (for 2 min), lineage depletion using biotinylated antibodies (incubation for 15 min) followed by Streptavidin-conjugated beads (Roche) (incubation for 7 min) and immune-magnetic (Stem Cell Technologies) depletion (incubation for 7 min). Lineage depleted cells were finally stained with color-conjugated primary antibodies for 90 minutes on ice. FACS analysis and sorting was performed on FACS ARIA III (BD Biosciences).

### Immunostaining of transcription factors in primary HSPCs:

Immunostaining of TFs in primary HSPCs was performed according to protocols as described (Etzrodt et al., 2018; Hoppe et al., 2016). Briefly, HSPCs were isolated, directly seeded on Poly-L Lysine (Sigma Aldrich) coated, plastic-bottom 384 well plates (Greiner Bio-one), stored for 30 min at 4°C, fixed with 4% paraformaldehyde (Sigma Aldrich) for 10 min at RT, washed thrice with PBS, permeabilized with PBS-T (0.2 % triton X (AppliChem) in PBS) for 5 min, washed twice with TBS-T (0.1 % Tween (Sigma Aldrich) in TBS buffer), incubated with blocking buffer (10 % donkey serum (Jackson Immuno research) in TBS-T) for 1h at RT, incubated with primary antibodies (1:50 dilution in blocking buffer) overnight at 4°C, washed thrice with blocking buffer, stained with secondary antibodies (1:200 dilution in blocking buffer) for 1h, incubated with DAPI (1:10000 in blocking buffer), washed thrice with blocking buffer, incubated with PBS and imaged. Images were acquired on a Nikon Eclipse Ti-E microscope using Lumencore light source with 0.7x camera adapter and 10X objective with 0.45 NA (Plan Apo) and analyzed using bioimaging pipeline described below.

### Immunostaining of embryonic tissues:

The day of the vaginal plug was considered embryonic day (E) 0. Fresh isolated E14 embryos were immediately frozen, subsequently embedded on Optimal Cutting Temperature (OCT) (PolyFreeze, Sigma) and stored at -80°C until further processing. Full embryo cryosectioning (20  $\mu$ m thick) was performed with a cryostat (CryoStar™ NX50 Cryostat, ThermoFisher) on superfrost glass slides, immediately fixed with 4% PFA for 20 min at room temperature and then stored in 1xPBS at 4°C. Tissue sections were immunostained with primary antibodies diluted in blocking solution (0.5% Triton-X in PBS with 10% NDS) overnight at 4°C. Sections were washed twice in PBS and fluorescent secondary antibodies were applied in blocking solution for 90 min at room temperature. DAPI was used to visualize nuclei. Sections were again washed two times and mounted in ProLong Diamond Antifade Mountant (ThermoFisher). Confocal images were taken on a Leica TCS SP5 equipped with three photomultiplier tubes, two HyD detectors, five lasers (405 nm, Argon Laser (458, 476, 488, 496 and 514 nm), 561, 594 and 633 nm) using 10X and 20x objective lens. All scans were acquired at 20–25 °C, 100 Hz, in the



bidirectional mode, with z-spacing of 0.3 - 1  $\mu\text{m}$  at 1024x1024 pixel resolution. Images were acquired in 8-bit format.

#### **Immunostaining of adult kidney:**

**Tissue preparation:** Tissue sections were prepared as described before (Coutu et al., 2018). Bones were fixed for 24 hours in 4% PFA at 4° C. Kidneys were fixed for 1 hour in 4% PFA at room temperature. The tissues were embedded in 4% low-gelling temperature agarose and subsequently sectioned (100  $\mu\text{m}$  thick) using a vibratome (Leica VT1200 S).

**Immunostaining:** All steps were performed at room temperature with gentle rocking in double side adhesive silicon chambers (Grace Biolabs) glued on glass slides. Sections were blocked and permeabilized with TBS (final concentration 0.1M Tris, 0.15 M NaCl, pH 7.5) containing 0.05% Tween-20, 20% DMSO, 1% Triton X 100 and 10% donkey serum (Jackson Immuno Research) for a minimum of 2 hours. This buffer was also used to dilute all primary and secondary antibodies. Primary antibodies were applied overnight. Secondary antibodies were applied for 2 hours. After extensive washing (with TBS-T), sections were mounted in homemade mounting medium (80% Glycerol in TBS containing 0.2 M N-propyl gallate, pH 8.5) using size 1.5 coverslips.

**Confocal microscopy:** Confocal microscopy was performed on a Leica TCS SP8 equipped with three photomultiplier tubes, two HyD detectors, five lasers (405 nm, Argon Laser (458, 476, 488, 496 and 514 nm), 561, 594 and 633 nm) using Leica type G immersion liquid and a 63x glycerol immersion lens (NA 1.3, FWD 0.28 mm). All scans were acquired at 20–25 °C, 400 Hz, in the bidirectional mode, with z-spacing of 1  $\mu\text{m}$  (the optical slice thickness of the optics was 0.99  $\mu\text{m}$ ) at 1024x1024 pixel resolution. Images were acquired in 8-bit format. For signal acquisition only HyD detectors were used.

#### **Protein stability assay of transcription factors:**

HSPCs were sorted (described above) and cultured in plastic-bottom 384 well plates in multi-lineage supporting media (IMDM (Gibco) + 5 % BIT + P/S (Gibco) + SCF + EPO + TPO + IL3 + IL6). Cells were treated with 50  $\mu\text{M}$  cyclohexamide (Sigma Aldrich) for indicated time duration, fixed immediately with 4% paraformaldehyde (Sigma Aldrich) and proceeded with standard immunostaining protocol (described above) (Hoppe et al., 2016).

#### **Single-cell liquid culture colony assay of HSPCs:**

HSPCs were single-cell sorted in plastic-bottom 384 well plates (Greiner Bio-one) using FACS ARIA III with pan myeloid culture media as described (IMDM (Gibco) + 5 % BIT (Stem Cell Technologies) + 10% FCS (PAA) + P/S (Gibco) + SCF + GM-CSF + IL3 + IL9) (Drissen et al., 2016). Plates were incubated at 37° C and 5% CO<sub>2</sub>. At day 8, color-conjugated antibodies against lineage markers were added (1:5000) to wells, incubated for 3 hours at 37°C and 5% CO<sub>2</sub> and imaged. Images were acquired on a Nikon Eclipse Ti-E microscope using Lumencore light source with 0.7x camera adapter and 10X objective with 0.45 NA (Plan Apo) and analyzed as described below.

#### **FACS analysis of bulk-liquid culture colonies:**

HSPCs were sorted using FACS ARIA III and 100 – 200 cells were seeded in each well of 24 well plates (Thermo scientific) with pan myeloid media (described above). Plates were incubated at 37° C and 5% CO<sub>2</sub>. At day 8, cells were taken, washed with FACS buffer (2% FCS in PBS), stained with color-conjugated antibodies against lineage markers, incubated for 90 min at 4°C and washed with FACS buffer. Finally, FACS analysis of cell types was performed using FACS ARIA III.

#### **May-Grünwald and Giemsa staining of mature colonies:**

May-Grünwald and Giemsa staining was performed according to protocol as described (Hettich). Briefly, cytospin hardware was arranged and 200  $\mu\text{l}$  of cells were taken directly from day 8 culture of HSPCs and added on cytospin columns. Cells were centrifuged at 270g for 3 minutes. Supernatant was removed carefully followed by second round of centrifugation at 270g for 1 minute. Air dried the slides and 1 ml of May-Grünwald (Roth) solution was added for 4 minutes. Slides were washed twice with dist. H<sub>2</sub>O and 1 ml of 5% Giemsa solution (Sigma Aldrich) was added for 16 minutes. Slides were washed twice with dist. H<sub>2</sub>O. Air-dried the slides followed by imaging. All steps were performed at 4° C. Images were acquired using Nikon Eclipse Ti-E microscope.

#### **Bioimaging pipeline for image acquisition, detection and quantification:**

Fluorescence images (immunostaining of transcription factors and single-cell liquid colony assays) were acquired on Nikon Eclipse Ti-E microscope in an automated manner using custom written software. Single-cell colonies were analyzed based on fluorescence signal of surface markers and scored manually. To count the number of cells per colony, cells were segmented in brightfield based on morphology and quantified using FastER segmentation tool (Hilsenbeck et al., 2017). To quantify the signal of transcription factors in single cells, background signal was normalized by using BaSiC tool as previously described (Peng et al., 2017) and segmentation of cells was

performed on DAPI signal. Finally, quantification of transcription factor signal was performed using fastER segmentation tool as described(Hilsenbeck et al., 2017). Data was analyzed using custom written R scripts.

## References:

- Anastassiadis, K., Schnütgen, F., von Melchner, H., and Stewart, A.F. (2013). Gene Targeting and Site-Specific Recombination in Mouse ES Cells. *Methods Enzymol.* *533*, 133–155.
- Arinobu, Y., Iwasaki, H., Gurish, M.F., Mizuno, S., Shigematsu, H., Ozawa, H., Tenen, D.G., Austen, K.F., and Akashi, K. (2005). Developmental checkpoints of basophil/mast cell lineages in adult murine hematopoiesis. *102*, 1–6.
- Cabezas-Wallscheid, N., Klimmeck, D., Hansson, J., Lipka, D.B., Reyes, A., Wang, Q., Weichenhan, D., Lier, A., Von Paleske, L., Renders, S., et al. (2014). Identification of regulatory networks in HSCs and their immediate progeny via integrated proteome, transcriptome, and DNA methylome analysis. *Cell Stem Cell* *15*, 507–522.
- Chen, C.-C., Grimbaldston, M.A., Tsai, M., Weissman, I.L., and Galli, S.J. (2005). Identification of mast cell progenitors in adult mice. *Proc. Natl. Acad. Sci.* *102*, 11408–11413.
- Coutu, D.L., Kokkaliaris, K.D., Kunz, L., and Schroeder, T. (2018). Multicolor quantitative confocal imaging cytometry. *Nat. Methods* *15*, 39–46.
- Drissen, R., Buza-Vidas, N., Woll, P., Thongjuea, S., Gambardella, A., Giustacchini, A., Mancini, E., Zriwil, A., Lutteropp, M., Grover, A., et al. (2016). Distinct myeloid progenitor-differentiation pathways identified through single-cell RNA sequencing. *Nat. Immunol.* *17*, 666–676.
- Dymecki, S.M. (1996). Flp recombinase promotes site-specific DNA recombination in embryonic stem cells and transgenic mice. *Proc. Natl. Acad. Sci.* *93*, 6191–6196.
- Etzrodt, M., Ahmed, N., Hoppe, P.S., Loeffler, D., Skylaki, S., Hilsenbeck, O., Kokkaliaris, K.D., Kaltenbach, H.-M., Stelling, J., Nerlov, C., et al. (2018). Inflammatory signals directly instruct PU.1 in HSCs via TNF. *Blood* *blood-2018-02-832998*.
- Hettinger, J., Richards, D.M., Hansson, J., Barra, M.M., Joschko, A.C., Krijgsveld, J., and Feuerer, M. (2013). Origin of monocytes and macrophages in a committed progenitor. *Nat. Immunol.* *14*, 821–830.
- Hilsenbeck, O., Schwarzfischer, M., Loeffler, D., Dimopoulos, S., Hastreiter, S., Marr, C., Theis, F.J., and Schroeder, T. (2017). FastER: A User-Friendly tool for ultrafast and robust cell segmentation in large-scale microscopy. *Bioinformatics* *33*, 2020–2028.
- Hoppe, P.S., Schwarzfischer, M., Loeffler, D., Kokkaliaris, K.D., Hilsenbeck, O., Moritz, N., Ende, M., Filipczyk, A., Gambardella, A., Ahmed, N., et al. (2016). Early myeloid lineage choice is not initiated by random PU.1 to GATA1 protein ratios. *Nature* *535*, 299–302.
- Iwasaki, H., Mizuno, S., Mayfield, R., Shigematsu, H., Arinobu, Y., Seed, B., Gurish, M.F., Takatsu, K., and Akashi, K. (2005). Identification of eosinophil lineage-committed progenitors in the murine bone marrow. *J. Exp. Med.* *201*, 1891–1897.
- Kiel, M.J., Yilmaz, O.H., Iwashita, T., Yilmaz, O.H., Terhorst, C., and Morrison, S.J. (2005). SLAM family receptors distinguish hematopoietic stem and progenitor cells and reveal endothelial niches for stem cells. *Cell* *121*, 1109–1121.
- Peng, T., Thorn, K., Schroeder, T., Wang, L., Theis, F.J., Marr, C., and Navab, N. (2017). A BaSiC tool for background and shading correction of optical microscopy images. *Nat. Commun.* *8*, 1–7.
- Pop, R., Shearstone, J.R., Shen, Q., Liu, Y., Hallstrom, K., Koulis, M., Gribnau, J., and Socolovsky, M. (2010). A key commitment step in erythropoiesis is synchronized with the cell cycle clock through mutual inhibition between PU.1 and S-phase progression. *PLoS Biol.* *8*.
- Pronk, C.J.H., Rossi, D.J., Månsson, R., Attema, J.L., Norddahl, G.L., Chan, C.K.F., Sigvardsson, M., Weissman, I.L., and Bryder, D. (2007). Elucidation of the Phenotypic, Functional, and Molecular Topography of a Myeloerythroid Progenitor Cell Hierarchy. *Cell Stem Cell* *1*, 428–442.
- Qi, X., Hong, J., Chaves, L., Zhuang, Y., Chen, Y., Wang, D., Chabon, J., Graham, B., Ohmori, K., Li, Y., et al. (2013). Antagonistic Regulation by the Transcription Factors C/EBP $\alpha$  and MITF Specifies Basophil and Mast Cell Fates. *Immunity* *39*, 97–110.
- Wilson, A., Laurenti, E., Oser, G., van der Wath, R.C., Blanco-Bose, W., Jaworski, M., Offner, S., Dunant, C.F., Eshkind, L., Bockamp, E., et al. (2008). Hematopoietic Stem Cells Reversibly Switch from Dormancy to Self-Renewal during Homeostasis and Repair. *Cell* *135*, 1118–1129.
- Yanez, A., Ng, M.Y., Hassanzadeh-kiabi, N., and Goodridge, H.S. (2017). IRF8 acts in lineage-committed rather than oligopotent progenitors to control neutrophil vs monocyte production. *125*, 1452–1460.
